# Supplementary material for: COVID-19 lockdown NO x emission reductions can explain most of the coincident increase in global atmospheric methane
Source: Copernicus journal article supplement (doi:10.5194/acp-2021-604), 2021-08-03
Supplement: Supplementary file [file acp-2021-604-AC1-supplement.pdf]

We would like to thank the three referees for their invaluable comments. The main points requiring a response are repeated below in italics, followed by our responses.

### **Referee #1**

*First, the authors did not assess the impact of other species whose emissions may also have reduced together with NO<sub>x</sub> during COVID-19, for example, CO and NMVOC. Reduced emissions of these species have an opposite effect to that of NO<sub>x</sub>, that is, to increase OH and reduce CH<sub>4</sub> lifetime. According to Fig 3 of Lamboll et al. (2021), emissions of CO and NMVOC were also substantially reduced though with slightly smaller fractions compared to NO<sub>x</sub>. Fry et al. (2012) showed with their model that the net effect on OH is close to 0 with compensating effects from a combined 20% reduction of NO<sub>x</sub>, CO, and NMVOC. So, the author's argument can be much stronger if they can estimate the net chemical effect of the COVID-19 emission perturbation.*

### **Response**

This is a good point. We have now applied essentially the same methodology to assess the impacts of CO and NMVOC emissions reductions associated with lockdowns. We use sensitivities calculated by Fry et al. (2012) for the four regions considered within their HTAP study, together with regional and global estimates of lockdown emissions reductions from Lamboll et al. (2021). For emissions changes outside the four regions, we use a global sensitivity value. Results for CO are shown in Table 1 and NMVOC in Table 2. This method only uses sensitivities from Fry et al. (2012), whereas in our original submission we used sensitivities for NO<sub>x</sub> from some earlier studies as well. For the sake of consistency, we also show in Table 3 revised values for surface NO<sub>x</sub> using the same methodology as for CO and NMVOC.

In addition, we now include an uncertainty range on our values, based on the spread ( $\pm 1$  Standard Deviation) of sensitivities found within the 11 HTAP models. This is not a full assessment of uncertainty as we don't consider uncertainty in the lockdown emissions reductions.

We find that the impact on global methane from surface NO<sub>x</sub> emission reductions during lockdown is +3.5 ppb, with a range of +2.4 to +4.5 ppb (Table 3). Adding the component from aircraft NO<sub>x</sub> (+0.7 ppb) brings the total NO<sub>x</sub> effect to +4.2 ppb (range +3.1 to +5.2 ppb). The central value is slightly less than that in our original submission (+4.9 ppb), due to the exclusive use of sensitivity values from Fry et al. (2012) rather than also using hemispheric-scale sensitivity results from earlier studies. The impact from COVID lockdown CO emission reductions on methane is -1.3 ppb (range -0.8 to -1.8 ppb) (Table 2) and for NMVOC it is -0.7 ppb (-0.2 to -1.3 ppb). Inclusion of CO and NMVOC emission reductions counteracts about half of the estimated effect from NO<sub>x</sub>, so these are significant, as suggested by the reviewer. However, NO<sub>x</sub> remains the largest, and overall dominant, component.

For both NO<sub>x</sub> and NMVOC, accounting for spatial variations (using the four HTAP regions) in surface emissions increases the overall sensitivity of methane to NO<sub>x</sub> by +15% compared to using a simple global sensitivity. Spatial variations for CO make little difference, due to its longer lifetime.

| CO emission region | $\Delta\text{CH}_4/\Delta\text{E}_{\text{CO}}$<br>ppb(CH <sub>4</sub> )/Tg(CO) yr <sup>-1</sup> | 2020-2019 $\Delta\text{E}_{\text{CO}}$<br>Tg(CO) yr <sup>-1</sup> | $\Delta\text{CH}_4$<br>ppb(CH <sub>4</sub> ) |
|--------------------|-------------------------------------------------------------------------------------------------|-------------------------------------------------------------------|----------------------------------------------|
| Global             | 0.0175                                                                                          | -73.38                                                            | -1.284                                       |
| Europe             | 0.0167                                                                                          | -6.09                                                             | -0.102                                       |
| N. America         | 0.0187                                                                                          | -7.49                                                             | -0.140                                       |
| E. Asia            | 0.0178                                                                                          | -24.58                                                            | -0.438                                       |
| S. Asia            | 0.0163                                                                                          | -16.76                                                            | -0.273                                       |
| Global - 4 regions | (0.0175)                                                                                        | -18.48                                                            | -0.323                                       |
| Sum (+/-1 SD)      |                                                                                                 |                                                                   | -1.3 (-0.8 to -1.8)                          |

**Table 1** Sensitivities of global methane mole fraction to changes in surface anthropogenic CO emissions ( $\Delta\text{CH}_4/\Delta\text{E}_{\text{CO}}$ , ppb(CH<sub>4</sub>)/Tg(CO) yr<sup>-1</sup>) (Fry et al., 2012); estimated reductions in CO emissions in 2020 relative to 2019 (Tg(CO) yr<sup>-1</sup>) (Lamboll et al., 2021); and resultant estimated changes in global methane mole fraction (ppb). We show global values, and values for the four HTAP regions. We use the global sensitivity value to compute a methane change resulting from the emissions changes outside the four regions. We sum methane changes from the four regions plus the rest of the world to yield a global value that accounts for the regional variations in sensitivity. We include an estimated uncertainty range based on the one standard deviation range in sensitivities found by the HTAP models (Fry et al., 2012).

| NMVOC emission region | $\Delta\text{CH}_4/\Delta\text{E}_{\text{NMVOC}}$<br>ppb(CH <sub>4</sub> )/Tg(C) yr <sup>-1</sup> | 2020-2019 $\Delta\text{E}_{\text{NMVOC}}$<br>Tg(C) yr <sup>-1</sup> | $\Delta\text{CH}_4$<br>ppb(CH <sub>4</sub> ) |
|-----------------------|---------------------------------------------------------------------------------------------------|---------------------------------------------------------------------|----------------------------------------------|
| Global                | 0.0407                                                                                            | -15.65                                                              | -0.636                                       |
| Europe                | 0.0398                                                                                            | -1.71                                                               | -0.0681                                      |
| N. America            | 0.0353                                                                                            | -1.56                                                               | -0.0551                                      |
| E. Asia               | 0.0333                                                                                            | -2.41                                                               | -0.0803                                      |
| S. Asia               | 0.0691                                                                                            | -4.34                                                               | -0.2999                                      |
| Global - 4 regions    | (0.0407)                                                                                          | -5.63                                                               | -0.2291                                      |
| Sum (+/-1SD)          |                                                                                                   |                                                                     | -0.7 (-0.2 to -1.3)                          |

**Table 2** Sensitivities of global methane mole fraction to changes in surface anthropogenic NMVOC emissions ( $\Delta\text{CH}_4/\Delta\text{E}_{\text{NMVOC}}$ , ppb(CH<sub>4</sub>)/Tg(C) yr<sup>-1</sup>) (Fry et al., 2012); estimated reductions in NMVOC emissions in 2020 relative to 2019 (Tg(C) yr<sup>-1</sup>) (Lamboll et al., 2021); and resultant estimated changes in global methane mole fraction (ppb). We show global values, and values for the four HTAP regions. We use the global sensitivity value to compute a methane change resulting from the emissions changes outside the four regions. We sum methane changes from the four regions plus the rest of the world to yield a global value that accounts for the regional variations in sensitivity. We include an estimated uncertainty range based on the one standard deviation range in sensitivities found by the HTAP models (Fry et al., 2012).

| NOx emission region | $\Delta\text{CH}_4/\Delta\text{E}_{\text{NOx}}$<br>ppb(CH <sub>4</sub> )/Tg(NO <sub>2</sub> ) yr <sup>-1</sup> | 2020-2019 $\Delta\text{E}_{\text{NOx}}$<br>Tg(NO <sub>2</sub> ) yr <sup>-1</sup> | $\Delta\text{CH}_4$<br>ppb(CH <sub>4</sub> ) |
|---------------------|----------------------------------------------------------------------------------------------------------------|----------------------------------------------------------------------------------|----------------------------------------------|
| Global              | -0.1570                                                                                                        | -19.381                                                                          | 3.043                                        |
| Europe              | -0.1001                                                                                                        | -2.650                                                                           | 0.265                                        |
| N. America          | -0.1674                                                                                                        | -2.548                                                                           | 0.427                                        |
| E. Asia             | -0.1560                                                                                                        | -4.399                                                                           | 0.686                                        |
| S. Asia             | -0.3091                                                                                                        | -3.782                                                                           | 1.169                                        |
| Global - 4 regions  | (-0.1570)                                                                                                      | -6.002                                                                           | 0.942                                        |
| Sum (+/-1SD)        |                                                                                                                |                                                                                  | 3.5 (2.4 to 4.5)                             |

**Table 3** Sensitivities of global methane mole fraction to changes in surface anthropogenic NOx emissions ( $\Delta\text{CH}_4/\Delta\text{E}_{\text{NOx}}$ , ppb(CH<sub>4</sub>)/Tg(NO<sub>2</sub>) yr<sup>-1</sup>) (Fry et al., 2012); estimated reductions in NOx emissions in 2020 relative to 2019 (Tg(NO<sub>2</sub>) yr<sup>-1</sup>) (Lamboll et al., 2021); and resultant estimated changes in global methane mole fraction (ppb). We show global values, and values for the four HTAP regions. We use the global sensitivity value to compute a methane change resulting from the emissions changes outside the four regions. We sum methane changes from the four regions plus the rest of the world to yield a global value that accounts for the regional variations in sensitivity. We include an estimated uncertainty range based on the one standard deviation range in sensitivities found by the HTAP models (Fry et al., 2012).

*Second, the calculation of the authors relies on the sensitivity of CH<sub>4</sub> mixing to NO<sub>x</sub> emissions, taken from previous studies. Most of the studies cited are from the 2000s. The "baseline" emissions of NO<sub>x</sub> as well as other chemicals may have changed a lot from the early 2000s to 2020. I wonder if the sensitivity of global OH and CH<sub>4</sub> to NO<sub>x</sub> emissions will also change, and if so change by how much, with the "baseline" emissions. This chemical system is known to be nonlinear.*

## **Response**

This is also a good point. We fully appreciate that atmospheric OH chemistry is non-linear and the derived model sensitivities are somewhat dependent on the baseline emissions in the models, and that the baseline used in the HTAP study (and the earlier studies we used) differed from the 2020 emissions. However, we can only work with what we have available. As far as we are aware, there has been no published analysis of OH changes and impacts on methane from the second phase of the HTAP study, nor have there been more up-to-date regional analyses within other model inter-comparisons. Derwent et al. (2021) show that although chemical mechanisms used by global models have been developed and updated since 2000, they have not changed significantly. So we feel that the Fry et al. (2012) study is the most useful available study for both providing regional sensitivities, and also providing a model spread of sensitivities. We also feel that even though the system is non-linear, the sensitivities are unlikely to differ markedly from those derived from the HTAP study. Conducting a whole new HTAP style set of integrations with either a single model, or ideally a number of models, in order to analyse methane responses during the COVID lockdowns would be ideal, but that is beyond the scope of what we currently have available (see comments about HTAP phase 2 results below). In the revised version of the paper, we will only use the earlier studies to introduce the methodology; we will use sensitivity values for surface emissions sensitivities from Fry et al. (2012) as we consider this study to be the most up-to-date source of useful information.

*Third, independent observation evidence on reduced global OH, if there is, can be really powerful. The 5 ppb additional increase in methane mixing ratio translates roughly to a 3% decrease in global OH concentration if they were attributed entirely to reduced NO<sub>x</sub> emissions. This magnitude of decrease in global OH can have detectable signals on burden or distribution on many species besides CH<sub>4</sub>, such as CH<sub>3</sub>CCl<sub>3</sub>. If these analyses are consistent with the author's hypothesis of NO<sub>x</sub> chemical feedback, it can really increase the confidence, though it may be a lot of work.*

## **Response**

Again, we agree, and independent observational evidence of changes in OH would be very useful. However, after a quick look at recent data, including CH<sub>3</sub>CCl<sub>3</sub>, it is not immediately obvious that there are measurements available that can provide clear evidence of OH changes. So we think this is beyond our scope with this paper.

## Referee #2

1. My main concern is that the authors directly apply the sensitivity of CH<sub>4</sub> to NO<sub>x</sub> emission changes estimated by previous studies for broad regions using different models for different periods. Since the OH chemistry is higher nonlinear, such estimation can lead to a large bias. For example, if we use the sensitivity of OH to NO<sub>x</sub> emission changes in the N. Hemisphere (-0.39) and the 16.72Tg NO<sub>x</sub> emission changes to estimate CH<sub>4</sub> changes, we get 6.5Tg CH<sub>4</sub> changes in the N. Hemisphere, much smaller than the 8.5Tg when considering sensitivity in 4 different regions. The sensitivity given by Wild et al. (2011) and Derwent et al. (2011) are estimated by perturbing the emission for the whole year, but the lock-down time-period are different in each country. For example, the emission reductions in China (East Asia) mainly occur during February, and gradually back to normal from April (Fig.6 in Miyazaki et al. (2021)). In winter the sensitivity of CH<sub>4</sub> to OH may be much lower than in other seasons (low OH production and CH<sub>4</sub>+OH reaction rate). Thus apply the sensitivity estimated for the whole year may lead to overestimation of CH<sub>4</sub> changes. In addition, most of the sensitivities in table 1 are estimated based on simulation for 2000 or earlier. Changes in global emissions from 2000 may influence the sensitivity of OH to precursor gases.

I agree that the reduction in NO<sub>x</sub> can contribute to the rising CH<sub>4</sub> during 2020, but I don't think the 4.9ppb increase in the CH<sub>4</sub> mixing ratio estimated in this study is reliable considering the nonlinearity in OH chemistry. Besides, emissions of other chemical species such as CO also changed during the lockdown period. So, the conclusion that "the NO<sub>x</sub> changes can account for all or most of the observed methane changes" cannot be supported by the simple calculation present in the manuscript. The changes in emissions are already available (Lamboll et al. 2021). I recommend the authors quantify the sensitivity of OH to emission reductions by conducting model simulations for 2020.

## Response

We agree that our method is a simplification, but we think that it is probably close enough to the right answer to be useful. Of course, the spatial and temporal structure of the emissions changes will influence the resulting perturbation to OH and methane. We hope that by including inter-model uncertainties from Fry et al. (2012) in our estimates of the regional and global sensitivities (see Tables 1-3) that we now convey a better sense of the level of uncertainty in our simple modelling approach. We agree that the statement that NO<sub>x</sub> changes can account for "all or most" of the observed methane changes was a bit too strong, and we will tone down our language in the revised version. We do feel that our simple modelling shows that changes in emissions (and in particular NO<sub>x</sub>) associated with the lockdowns can account for a significant component of the observed methane change. Future, more detailed modelling will be needed to better spatially and temporally resolve the contributions to the observed methane changes from emissions changes more precisely.

NB Wild et al. (2001) perturbed emissions for a whole year, but Derwent et al. (2001) perturbed emissions for a single month (January). No study has investigated seasonal variations in the methane response for surface emissions, but Stevenson et al. (2004) calculated impacts from aircraft NO<sub>x</sub> for January, April, July and October, and found a modest seasonality in response. The largest response was found in July, when the impact of aircraft NO<sub>x</sub> on methane was 10% larger than the annual mean value (Figure 2d and Table 4 of Stevenson et al., 2004).

2. Most of the sensitivity of CH<sub>4</sub> to NO<sub>x</sub> emissions changes listed in Table 1 is not the original data that we can find from the references. I think the authors should clarify how they convert the data from the references to which is listed in table 1 in the supplementary.

### Response

We attempted to succinctly describe our methods for deriving the sensitivities in the original submission. We will add more details in the revised paper to clarify exactly where the values come from.

### Referee #3

*While the findings are definitely interesting and make use of pre-existing model studies, for a research paper in Atmos. Chem. Phys., the analysis is not substantial enough. For example, the paper makes use of methane-to-NO<sub>x</sub> sensitivities based on very broad regions in the case of surface emissions (N. America, Europe, S. and E. Asia, Southern Hemisphere) and a global sensitivity scaling factor in the case of aircraft emissions, despite the spatial heterogeneity in sensitivity, as the authors themselves noted. In particular, the southern hemisphere is treated as a single region, despite the potential for increased sensitivity in low-NO<sub>x</sub> regions. More regional-scale sensitivities could be available through Phase 2 of the Hemispheric Transport of Air Pollution initiative, but the authors did not explore their applicability to support their hypothesis.*

### Response

We agree, to some extent, with all these comments. The paper was originally submitted as an ACP Letter ([https://www.atmospheric-chemistry-and-physics.net/about/manuscript\\_types/acp\\_letters.html](https://www.atmospheric-chemistry-and-physics.net/about/manuscript_types/acp_letters.html)) which partly explains its brevity. We wished to alert the community to our findings rapidly, as we felt that they were of considerable interest – partly to stimulate others to do the more substantial research required to confirm (or refute) our suggestion. We agree that there may be important spatial structure in the sensitivities that will not be represented by using the broad HTAP regions. However, we think it is likely that the overall result will not be substantially different even if more detailed modelling is performed. Exploitation of the Phase 2 HTAP results is an excellent idea, but no analysis has yet been conducted on the responses of OH or methane within this study, so we would need to start from scratch. We are looking into this, but it is beyond the scope of this initial study. As explained above, we focussed on results from the first phase of HTAP presented by Fry et al. (2012) as we feel these are the best available results we can easily use.

One subtlety about the spatial variations is worth clarifying. The sensitivities we use, although representative of broad regions, do take into account the spatial distribution of emissions within those regions. The advantage gained by using smaller regions is that the folding of emissions change and sensitivity is performed at a higher resolution, so a more realistic answer is produced. The real sensitivities for a region will only differ strongly if the spatial distribution of emissions changes between the time of the experiment we use to diagnose the sensitivity and those during the 2020 lockdown. As argued above, whilst there have been changes over the last two decades, we don't think the sensitivities will be very different from those found by Fry et al. (2012). The emissions changes during lockdown also had spatial structures quite similar to the baseline emissions distributions, which also means the sensitivities used are appropriate.

*The second major consideration is that the potential impact of changes in commensurate emissions of carbon monoxide and/or volatile organic compounds during national lockdowns on the atmospheric methane growth rate was not quantified. Although NO<sub>x</sub> is clearly a contributing factor, it is not the sole influence and these other potential contributors to changes in methane growth rate were not assessed.*

## **Response**

See our above response on this topic to Referee #1. We stressed in the original submission that NO<sub>x</sub> was not the sole influence, but one of several factors. We also stressed that we thought it was a major factor, and we maintain that assertion.

*Finally, the authors cite the paper of Lamboli et al. who estimate the emissions reductions due to COVID lockdowns and outline a protocol for global climate and Earth System Model simulations. First results on the climate response from these model simulations have been published and interactive chemistry was included in a number of models. Therefore, there is data available that could address the spatial heterogeneity of the methane sensitivities and the role of other emission changes that would add substantially to this analysis.*

## **Response**

We did refer to some results from detailed simulations with interactive chemistry of the COVID lockdowns in our original submission (e.g., Weber et al., 2020; Miyazaki et al., 2021). We will include any more recent papers with relevant results in our revised version. However, we don't know of any current data that would address the impacts from different emissions components or regions on OH during lockdown, so we believe the HTAP results from Fry et al. (2012) to be the most relevant for estimating the component impacts on methane.

## **Acknowledgements**

DS would like to thank PhD student Jize Jiang for technical assistance with some of the analysis.

## **Reference** (in addition to those in the original submission)

Richard G. Derwent, David D. Parrish, Alex T. Archibald, Makoto Deushi, Susanne E. Bauer, Kostas Tsigaridis, Drew Shindell, Larry W. Horowitz, M. Anwar H. Khan, Dudley E. Shallcross (2021) Intercomparison of the representations of the atmospheric chemistry of pre-industrial methane and ozone in Earth system and other global chemistry-transport models, Atmospheric Environment, Volume 248, 118248, <https://doi.org/10.1016/j.atmosenv.2021.118248>
